# Supplementary material for: Follow-Up of PRRSv-Vaccinated Piglets Born from PRRSv-Vaccinated, ELISA-Seropositive and ELISA-Seronegative Sows
Source: MDPI journal article supplement (doi:10.3390/v15020479), 2023-02-09
Supplement: s1 [file s1]

**Supplementary Table S1.** Presence of PRRSv-specific maternally-derived antibodies (MDAs) in sixteen PRRSv-vaccinated sows originating from two Belgian farrow-to-finish herds. For each sow the ELISA 1 (IDEXX ELISA), ELISA 2 (CIVTEST ELISA) and VN (virus neutralization assay) MDA ratio was calculated by dividing the number of PRRSv-seropositive piglets by the total number of piglets originating from each respective sow, at either 3 weeks of age (herd 1) or 4 weeks of age (herd 2).

| Sow number (parity) | MDA ratio ELISA 1 | MDA ratio ELISA 2 | MDA ratio VN |
|---------------------|-------------------|-------------------|--------------|
| <i>Herd 1</i>       |                   |                   |              |
| Sow 1 (7)           | 0/8 (0.0)         | 0/8 (0.0)         | 0/8 (0.0)    |
| Sow 2 (4)           | 0/11 (0.0)        | 1/11 (0.09)       | 0/11 (0.0)   |
| Sow 3 (7)           | 0/13 (0.0)        | 4/13 (0.31)       | 0/13 (0.0)   |
| Sow 4 (5)           | 0/11 (0.0)        | 1/11 (0.09)       | 1/11 (0.09)  |
| Sow 5 (1)           | 0/11 (0.0)        | 0/11 (0.0)        | 0/11 (0.0)   |
| Sow 6 (6)           | 10/10 (1.0)       | 10/10 (1.0)       | 8/10 (0.8)   |
| Sow 7 (5)           | 9/9 (1.0)         | 8/9 (0.89)        | 6/9 (0.67)   |
| Sow 8 (1)           | 10/10 (1.0)       | 10/10 (1.0)       | 0/10 (0.0)   |
| <i>Herd 2</i>       |                   |                   |              |
| Sow 1 (5)           | 0/10 (0.0)        | 0/10 (0.0)        | 0/10 (0.0)   |
| Sow 2 (3)           | 0/8 (0.0)         | 0/8 (0.0)         | 1/8 (0.13)   |
| Sow 3 (3)           | 0/13 (0.0)        | 0/13 (0.0)        | 0/13 (0.0)   |
| Sow 4 (4)           | 12/12 (1.0)       | 12/12 (1.0)       | 0/12 (0.0)   |
| Sow 5 (3)           | 10/10 (1.0)       | 10/10 (1.0)       | 0/10 (0.0)   |
| Sow 6 (3)           | 9/12 (0.75)       | 0/12 (0.0)        | 0/12 (0.0)   |
| Sow 7 (1)           | 11/11 (1.0)       | 11/11 (1.0)       | 7/11 (0.64)  |
| Sow 8 (1)           | 14/14 (1.0)       | 12/14 (0.86)      | 0/14 (0.0)   |

**Supplementary Table S2.** PRRSv vaccine responses in piglets born from sixteen PRRSv-vaccinated sows originating from two Belgian farrow-to-finish herds. For each sow the ELISA 1 (IDEXX ELISA), ELISA 2 (CIVTEST ELISA), VN (virus neutralization assay) and PCR response ratio was calculated by dividing the number of PRRSv vaccinated, responding piglets by the total number of PRRSv-vaccinated piglets originating from each respective sow, at 3 weeks post-vaccination. Piglets of herd 1 were intramuscular PRRSv-vaccinated with the Porcilis® vaccine at 3 weeks of age. Piglets of herd 2 were intramuscular PRRSv-vaccinated with the Unistrain® vaccine at 4 weeks of age.

| Sow number (parity) | Response ratio ELISA 1 | Response ratio ELISA 2 | Response ratio VN | Response ratio PCR |
|---------------------|------------------------|------------------------|-------------------|--------------------|
| <i>Herd 1</i>       |                        |                        |                   |                    |
| Sow 1 (7)           | 5/5 (1.0)              | 5/5 (1.0)              | 0/5 (0.0)         | 5/5 (1.0)          |
| Sow 2 (4)           | 4/6 (0.67)             | 4/6 (0.67)             | 0/6 (0.0)         | 4/6 (0.67)         |
| Sow 3 (7)           | 10/10 (1.0)            | 6/10 (0.6)             | 0/10 (0.0)        | 10/10 (1.0)        |
| Sow 4 (5)           | 3/7 (0.43)             | 3/7 (0.43)             | 0/7 (0.0)         | 3/7 (0.43)         |
| Sow 5 (1)           | 4/8 (0.5)              | 2/8 (0.25)             | 0/8 (0.0)         | 5/8 (0.63)         |
| Sow 6 (6)           | 0/6 (0.0)              | 0/6 (0.0)              | 0/6 (0.0)         | 0/6 (0.0)          |
| Sow 7 (5)           | 1/5 (0.2)              | 0/5 (0.0)              | 0/5 (0.0)         | 1/5 (0.2)          |
| Sow 8 (1)           | 4/9 (0.44)             | 0/9 (0.0)              | 0/9 (0.0)         | 5/9 (0.56)         |
| <i>Herd 2</i>       |                        |                        |                   |                    |
| Sow 1 (5)           | 6/6 (1.0)              | 3/6 (0.5)              | 0/6 (0.0)         | 3/6 (0.5)          |
| Sow 2 (3)           | 3/5 (0.6)              | 1/5 (0.2)              | 0/5 (0.0)         | 3/5 (0.6)          |
| Sow 3 (3)           | 7/9 (0.78)             | 2/9 (0.22)             | 0/9 (0.0)         | 7/9 (0.78)         |
| Sow 4 (4)           | 8/8 (1.0)              | 6/8 (0.75)             | 1/8 (0.13)        | 5/8 (0.63)         |
| Sow 5 (3)           | 4/6 (0.67)             | 0/6 (0.0)              | 0/6 (0.0)         | 2/6 (0.33)         |
| Sow 6 (3)           | 6/8 (0.75)             | 2/8 (0.25)             | 0/8 (0.0)         | 2/8 (0.25)         |
| Sow 7 (1)           | 0/7 (0.0)              | 0/7 (0.0)              | 0/7 (0.0)         | 1/7 (0.14)         |
| Sow 8 (1)           | 6/10 (0.6)             | 1/10 (0.1)             | 0/10 (0.0)        | 2/10 (0.2)         |

**Supplementary Table S3.** PRRSv vaccine responses in piglets born from sixteen PRRSv-vaccinated sows originating from two Belgian farrow-to-finish herds. For each sow the ELISA 1 (IDEXX ELISA), ELISA 2 (CIVTEST ELISA), VN (virus neutralization assay) and PCR response ratio was calculated by dividing the number of PRRSv vaccinated, responding piglets by the total number of PRRSv-vaccinated piglets originating from each respective sow, at 8 weeks post-vaccination. Piglets of herd 1 were intramuscular PRRSv-vaccinated with the Porcilis® vaccine at 3 weeks of age. Piglets of herd 2 were intramuscular PRRSv-vaccinated with the Unistrain® vaccine at 4 weeks of age.

| Sow number (parity) | Response ratio ELISA 1 | Response ratio ELISA 2 | Response ratio VN | Response ratio PCR |
|---------------------|------------------------|------------------------|-------------------|--------------------|
| <i>Herd 1</i>       |                        |                        |                   |                    |
| Sow 1 (7)           | 5/5 (1.0)              | 4/5 (0.8)              | 3/5 (0.6)         | 4/5 (0.8)          |
| Sow 2 (4)           | 5/6 (0.83)             | 5/6 (0.83)             | 5/6 (0.83)        | 2/6 (0.33)         |
| Sow 3 (7)           | 9/10 (0.9)             | 9/10 (0.9)             | 3/10 (0.3)        | 6/10 (0.6)         |
| Sow 4 (5)           | 4/7 (0.57)             | 4/7 (0.57)             | 3/7 (0.43)        | 2/7 (0.29)         |
| Sow 5 (1)           | 5/8 (0.63)             | 5/8 (0.63)             | 2/8 (0.25)        | 3/8 (0.38)         |
| Sow 6 (6)           | 0/6 (0.0)              | 0/6 (0.0)              | 1/6 (0.17)        | 0/6 (0.0)          |
| Sow 7 (5)           | 4/5 (0.8)              | 4/5 (0.8)              | 0/5 (0.0)         | 3/5 (0.6)          |
| Sow 8 (1)           | 7/9 (0.78)             | 5/9 (0.56)             | 2/9 (0.22)        | 2/9 (0.22)         |
| <i>Herd 2</i>       |                        |                        |                   |                    |
| Sow 1 (5)           | 6/6 (1.0)              | 6/6 (1.0)              | 4/6 (0.67)        | 5/6 (0.83)         |
| Sow 2 (3)           | 5/5 (1.0)              | 4/5 (0.8)              | 1/5 (0.2)         | 4/5 (0.8)          |
| Sow 3 (3)           | 9/9 (1.0)              | 9/9 (1.0)              | 3/9 (0.33)        | 8/9 (0.89)         |
| Sow 4 (4)           | 8/8 (1.0)              | 8/8 (1.0)              | 2/8 (0.25)        | 7/8 (0.88)         |
| Sow 5 (3)           | 6/6 (1.0)              | 5/6 (0.83)             | 1/6 (0.17)        | 4/6 (0.67)         |
| Sow 6 (3)           | 8/8 (1.0)              | 8/8 (1.0)              | 4/8 (0.5)         | 8/8 (1.0)          |
| Sow 7 (1)           | 5/7 (0.71)             | 6/7 (0.86)             | 1/7 (0.14)        | 7/7 (1.0)          |
| Sow 8 (1)           | 8/10 (0.8)             | 8/10 (0.8)             | 1/10 (0.1)        | 10/10 (1.0)        |
