# Supplementary material for: Follow-Up of PRRSv-Vaccinated Piglets Born from PRRSv-Vaccinated, ELISA-Seropositive and ELISA-Seronegative Sows
Source: Viruses. 2023 Feb 9;15(2):479. doi: 10.3390/v15020479 (PMC9967088; doi:10.3390/v15020479)
Supplement: Supplementary file 1 [file viruses-15-00479-s001.zip]

Archive with 4 entries (4 files):
- Supplementary Figure S1.emf
- Supplementary Figure S2.emf
- Supplementary Figures S1 and S2.pdf
- Supplementary Tables.pdf
